# Supplementary material for: Chlorella vulgaris Extracts as Modulators of the Health Status and the Inflammatory Response of Gilthead Seabream Juveniles (Sparus aurata)
Source: MDPI journal article supplement (doi:10.3390/md20070407), 2022-06-21
Supplement: s1 [file s1]

## Supplementary Materials

**Table S1.** Primers for qPCR amplification in seabream gut.

| Gene                           | Symbol                        | Annealing T °C | Primer sequence                                            |
|--------------------------------|-------------------------------|----------------|------------------------------------------------------------|
| Mucin 2                        | <i>muc2</i>                   | 60             | F: ACGCTTCAGCAATCGCACCAT<br>R: CCACAACCACACTCCTCCACAT      |
| Mucin 13                       | <i>muc13</i>                  | 60             | F: TTCAAACCCGTGTGGTCCAG<br>R: GCACAAGCAGACATAGTTCGGATAT    |
| Interleukin-1 beta             | <i>il1<math>\beta</math></i>  | 60             | F: TCTTCAAATTCCTGCCACCA<br>R: CAATGCCACCTTGTGGTGAT         |
| Interleukin-34                 | <i>il34</i>                   | 60             | F: CATCAGGGTTCATCACAACG<br>R: GACTCCCTCTGCATCCTTGA         |
| Toll like receptor 1           | <i>tlr1</i>                   | 60             | F: GGGACCTGCCAGTGTGTAAC<br>R: GCGTGGATAGAGTTGGACTTGAG      |
| CD8 alpha                      | <i>cd8<math>\alpha</math></i> | 60             | F: CTCGACTGGTCGGAGTTAA<br>R: TCCATCAGCGGCTGCTCGT           |
| Immunoglobulin M               | <i>igm</i>                    | 59             | F: CAGCCTCGAGAAGTGGAAC<br>R: GAGGTTGACCAGGTTGGTGT          |
| Hepcidin                       | <i>hepc</i>                   | 60             | F: GCCATCGTGCTCACCTTTAT<br>R: CCTGCTGCCATACCCCATCTT        |
| Heat-shock protein 70          | <i>hsp70</i>                  | 55             | F: ACGGCATCTTTGAGGTGAAG<br>R: TGGCTGATGTCCTTCTGTG          |
| Glutathione peroxidase         | <i>gpx</i>                    | 60             | F: GAAGGTGGATGTGAATGGAAAAGATG<br>R: CTGACGGGACTCCAAATGATGG |
| Manganese superoxide dismutase | <i>Sod(mn)</i>                | 60             | F: CCTGACCTGACCTACGACTATGG<br>R: AGTGCCTCCTGATATTTCTCCTCTG |
| Elongation factor 1 $\alpha$   | <i>ef1<math>\alpha</math></i> | 58             | F: CTGTCAAGGAAATCCGTCGT<br>R: TGACCTGAGCGTTGAAGTTG         |
| Ribosomal protein 18S          | <i>rps18</i>                  | 60             | F: AGGGTGTGGCAGACGTTAC<br>R: CTTCTGCCTGTTGAGGAACC          |

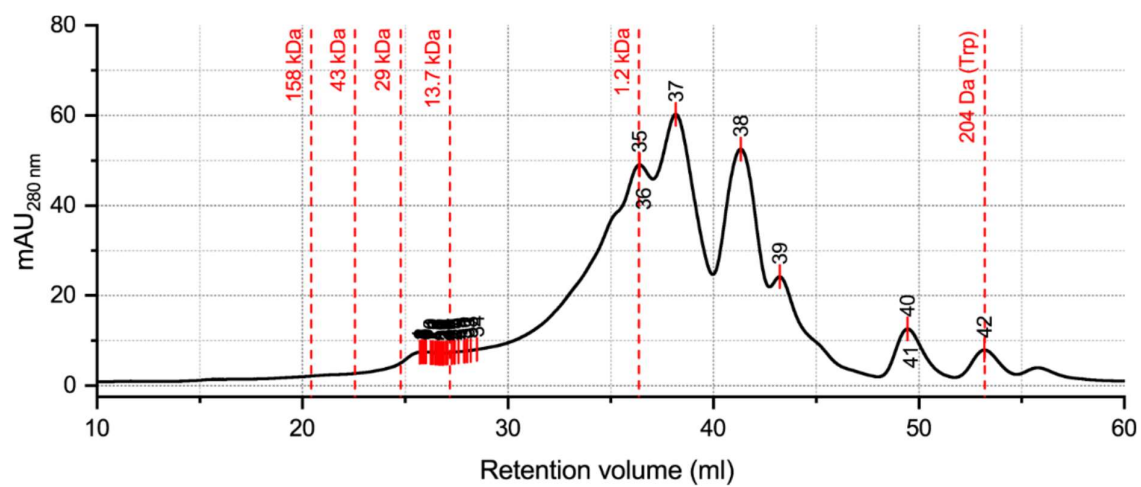

**Figure S1.** Protein/peptide profile of *C. vulgaris* peptide-enriched extract. Main molecular weight ranges, area of the main peak and the localization of all identified peaks as previously reported in Cunha, et al. [41].
